# Supplementary material
Source: Copernicus journal article supplement (doi:10.5194/egusphere-2026-1532)
Supplement: Supplementary file 1 [file egusphere-2026-1532-supplement.pdf]

*Supplement of*

**Southern African dust aerosols are rich in micronutrients, K-feldspar and carbonate minerals**

Clarissa Baldo et al.

5 *Correspondence to:* Clarissa Baldo ([clarissa.baldo@lisa.ipsl.fr](mailto:clarissa.baldo@lisa.ipsl.fr))

## List of Abbreviations

- AMMA = African Monsoon Multidisciplinary Analysis (2006), special observation period 0 (SOP0), Niger (Rajot et al., 2008); special observation periods 1 and 2 (SOP1-2), West Africa (Reeves et al., 2010).
- 10 DABEX = Dust And Biomass-burning Experiment (2006), Niger (Haywood et al., 2008)  
DODO = Dust Outflow and Deposition to the Oceans (2006), Senegal (McConnell et al., 2008)  
FENNEC = The Saharan Climate System (2010–2012), West Africa (Washington et al., 2012)  
GERBILS = Geostationary Earth Radiation Budget Intercomparisons of Longwave and Short-wave radiation (2007), Mauritania, Mali, and Niger (Haywood et al., 2011)
- 15 CESAM = Multiphase Atmospheric Experimental Simulation Chamber (Wang et al., 2011)  
GAMEL = Générateur d'Aérosol Minéral En Laboratoire (Lafon et al., 2014)  
Aus = Australia  
NAf = Northern Africa  
SAf = Southern Africa
- 20 SAm = Southern America  
ICP-AES = Inductively Coupled Plasma–Atomic Emission Spectroscopy  
ICP-MS = Inductively Coupled Plasma–Mass Spectrometry  
XRF = X-ray Fluorescence  
XRD = X-ray Diffraction
- 25 PIXE = Particle-Induced X-ray Emission  
PIGE = Particle-Induced Gamma-ray Emission  
SEM = Scanning Electron Microscopy  
PM<sub>10</sub> = Particles with an aerodynamic diameter less than 10 μm  
PM<sub>2.6</sub> = Particles with an aerodynamic diameter less than 2.6 μm
- 30 PM<sub>9</sub> = Particles with an aerodynamic diameter less than 9 μm  
TSP = Total Suspended Particles

**Table S1. Summary of dust aerosol samples and analyses in this study. For the sample collected along riverbed transects at ~100 m intervals, the reported coordinate represents an approximate central location of the transect.**

| <b>Sample ID</b> | <b>Location</b>        | <b>Latitude</b> | <b>Longitude</b> | <b>Generation</b> | <b>Available analyses</b> |
|------------------|------------------------|-----------------|------------------|-------------------|---------------------------|
| Kuiseb           | Kuiseb River           | -23.135         | 14.57395         | GAMEL             | XRF, XRD                  |
| Hope-Mine        | Hope Mine              | -23.5713        | 15.25013         | GAMEL             | XRF, XRD                  |
| GB-WF            | Namib GP               | -23.4509        | 15.03569         | GAMEL             | XRF, XRD                  |
| Etosha-West      | Etosha Pan             | -19.1249        | 15.97            | GAMEL             | XRF, XRD                  |
| 233-TRP          | Skukuza                | -24.9948        | 31.5887          | GAMEL             | XRF, XRD                  |
| 232-TRP          | Skukuza                | -24.9948        | 31.5887          | GAMEL             | XRF, XRD                  |
| 199-KAL          | Kalahari BOT           | -26.8248        | 20.67703         | GAMEL             | XRF, XRD                  |
| 184-BSW          | Kalahari BOT           | -18.3642        | 21.84194         | GAMEL             | XRF, XRD                  |
| 179-BSW          | Kalahari BOT           | -20.9767        | 22.48            | GAMEL             | XRF, XRD                  |
| MS-AGR           | Free State             | -28.21          | 26.15            | GAMEL             | XRF, XRD                  |
| HUAB_H123        | Huab River transect    | -20.86          | 13.65            | CESAM             | XRF                       |
| HUAB_H125        | Huab River transect    | -20.86          | 13.65            | CESAM             | XRF                       |
| HUAB_H127B       | Huab River transect    | -20.86          | 13.65            | CESAM             | XRF                       |
| HUAB_H127A       | Huab River transect    | -20.86          | 13.65            | CESAM             | XRF, XRD                  |
| HUAB_H129        | Huab River transect    | -20.86          | 13.65            | CESAM             | XRF, XRD                  |
| HUAB_H130        | Huab River transect    | -20.86          | 13.65            | CESAM             | XRF                       |
| HUAB_H131        | Huab River transect    | -20.86          | 13.65            | CESAM             | XRF, XRD                  |
| HUAB_H132        | Huab River transect    | -20.86          | 13.65            | CESAM             | XRF                       |
| HUAB_H133        | Huab River transect    | -20.86          | 13.65            | CESAM             | XRF, XRD                  |
| HUAB_H135        | Huab River transect    | -20.86          | 13.65            | CESAM             | XRF, XRD                  |
| HUAB_H139        | Huab River transect    | -20.86          | 13.65            | CESAM             | XRF                       |
| HUAB_H141        | Huab River transect    | -20.86          | 13.65            | CESAM             | XRF                       |
| HUAB_H143        | Huab River transect    | -20.86          | 13.65            | CESAM             | XRF                       |
| K89_AERO         | Kuiseb River transect  | -23.18          | 14.65            | CESAM             | XRF                       |
| K99_AERO         | Kuiseb River transect  | -23.18          | 14.65            | CESAM             | XRF                       |
| K103_AERO        | Kuiseb River transect  | -23.18          | 14.65            | CESAM             | XRF                       |
| K105_AERO        | Kuiseb River transect  | -23.18          | 14.65            | CESAM             | XRF                       |
| K109_AERO        | Kuiseb River transect  | -23.18          | 14.65            | CESAM             | XRF                       |
| K111_AERO        | Kuiseb River transect  | -23.18          | 14.65            | CESAM             | XRF                       |
| K113_AERO        | Kuiseb River transect  | -23.18          | 14.65            | CESAM             | XRF                       |
| K115_AERO        | Kuiseb River transect  | -23.18          | 14.65            | CESAM             | XRF                       |
| OMANN_O40        | Omaruru River transect | -22.03          | 14.35            | CESAM             | XRF                       |
| OMANN_O44        | Omaruru River transect | -22.03          | 14.35            | CESAM             | XRF                       |
| O46_AERO         | Omaruru River transect | -22.03          | 14.35            | CESAM             | XRF                       |
| OMANN_O46        | Omaruru River transect | -22.03          | 14.35            | CESAM             | XRF                       |
| OMANN_O51        | Omaruru River transect | -22.03          | 14.35            | CESAM             | XRF                       |
| O51_AERO         | Omaruru River transect | -22.03          | 14.35            | CESAM             | XRF                       |

|           |                        |        |       |       |     |
|-----------|------------------------|--------|-------|-------|-----|
| OMANN_O65 | Omaruru River transect | -22.03 | 14.35 | CESAM | XRF |
| OMANN_O67 | Omaruru River transect | -22.03 | 14.35 | CESAM | XRF |
| O67_AERO  | Omaruru River transect | -22.03 | 14.35 | CESAM | XRF |
| OMANN_O69 | Omaruru River transect | -22.03 | 14.35 | CESAM | XRF |
| OMANN_O71 | Omaruru River transect | -22.03 | 14.35 | CESAM | XRF |
| OMANN_O73 | Omaruru River transect | -22.03 | 14.35 | CESAM | XRF |
| OMANN_O75 | Omaruru River transect | -22.03 | 14.35 | CESAM | XRF |

35

**Table S2. Summary of data sources included in the integrated dataset of elemental composition and mineralogy of mineral dust.**

| Region | Reference                    | Study Area                                                                                                                                                                                    | Aerosol Collection                        | size              | Data Type                         | Analytical technique |
|--------|------------------------------|-----------------------------------------------------------------------------------------------------------------------------------------------------------------------------------------------|-------------------------------------------|-------------------|-----------------------------------|----------------------|
| SAf    | This study                   | Central Namib Gravel Plain; Western Kalahari; Etosha Pan, Huab, Omaruru, and Kuiseb riverbeds; savannah soils in South Africa; agricultural soils in the Free State; mining dust from Namibia | Laboratory soil-derived                   | PM <sub>10</sub>  | Elemental composition, Mineralogy | XRF; XRD             |
|        | Di Biagio et al. (2017)      | Central Namib Gravel Plain                                                                                                                                                                    | Laboratory soil-derived                   | PM <sub>10</sub>  | Elemental composition, Mineralogy | XRF; XRD             |
|        | Eltayeb et al. (1993)        | Central Namib Gravel Plain                                                                                                                                                                    | Laboratory soil-derived                   | PM <sub>2.6</sub> | Elemental composition             | XRF                  |
|        | Engelbrecht et al. (2016)    | Etosha Pan; Makgadikgadi Pans; Nxai Pan                                                                                                                                                       | Laboratory soil-derived                   | PM <sub>10</sub>  | Elemental composition             | XRF                  |
|        | Humphries et al. (2014)      | Okavango Delta                                                                                                                                                                                | Ground-based, near source                 | TSP               | Elemental composition             | XRF                  |
|        | Qu (2016)                    | Central Namib Gravel Plain; Western Kalahari                                                                                                                                                  | Laboratory soil-derived                   | PM <sub>10</sub>  | Elemental composition             | XRF                  |
| Aus    | Box et al. ( Jan 27-29 2010) | Lake Eyre Basin                                                                                                                                                                               | Ground-based, transported                 | TSP               | Elemental composition             | PIXE and PIGE        |
|        | Di Biagio et al. (2017)      | Lake Eyre Basin                                                                                                                                                                               | Laboratory soil-derived                   | PM <sub>10</sub>  | Elemental composition, Mineralogy | XRF; XRD             |
|        | Engelbrecht et al. (2016)    | Lake Eyre Basin                                                                                                                                                                               | Laboratory soil-derived                   | PM <sub>10</sub>  | Elemental composition             | XRF                  |
|        | Moreno et al. (2008)         | Lake Eyre Basin                                                                                                                                                                               | Laboratory soil-derived                   | PM <sub>10</sub>  | Elemental composition             | ICP-AES; ICP-MS      |
|        | Radhi et al. (2010a, 2010b)  | Lake Eyre Basin                                                                                                                                                                               | Ground-based, near source                 | TSP               | Elemental composition             | PIXE and PIGE        |
|        | Karlson et al. (2014)        | Lake Eyre Basin; Northwestern Australia                                                                                                                                                       | Ground-based, near source and transported | TSP               | Elemental composition             | PIXE and PIGE        |
| SAm    | Demasy et al. (2024)         | Patagonia                                                                                                                                                                                     | Laboratory soil-derived                   | PM <sub>10</sub>  | Elemental composition             | ICP-MS               |
|        | Di Biagio et al. (2017)      | Patagonia; Atacama Desert                                                                                                                                                                     | Laboratory soil-derived                   | PM <sub>10</sub>  | Elemental composition, Mineralogy | XRF; XRD             |
|        | Engelbrecht et al. (2016)    | Atacama Desert                                                                                                                                                                                | Laboratory soil-derived                   | PM <sub>10</sub>  | Elemental composition             | XRF                  |
|        | Gaiero et al. (2007); (2003) | Patagonia                                                                                                                                                                                     | Ground-based, transported                 | TSP               | Elemental composition             | ICP-AES; ICP-MS      |
|        | Qu (2016)                    | Patagonia                                                                                                                                                                                     | Laboratory soil-derived                   | PM <sub>10</sub>  | Elemental composition             | XRF                  |

|     |                           |                                                                                                         |                                                  |                                    |                                   |           |
|-----|---------------------------|---------------------------------------------------------------------------------------------------------|--------------------------------------------------|------------------------------------|-----------------------------------|-----------|
|     | Rojas et al. (1990)       | Atacama Desert; Remote sites across Argentina, Bolivia, and Brazil                                      | Ground-based, near source                        | TSP                                | Elemental composition             | XRF       |
| NAf | Di Biagio et al. (2017)   | Sahara Desert; Sahel; Bodélé Depression                                                                 | Laboratory soil-derived                          | PM <sub>10</sub>                   | Elemental composition, Mineralogy | XRF; XRD  |
|     | Engelbrecht et al. (2016) | Sahel; Bodélé Depression; Lake Iriki                                                                    | Laboratory soil-derived                          | PM <sub>10</sub>                   | Elemental composition             | XRF       |
|     | Formenti et al. (2014)    | West Africa (AMMA-SOP-1/2); Niger (AMMA-SOP0; DABEX); Senegal (DODO); Mauritania, Mali, Niger (GERBLIS) | Aircraft, near source; Ground-based, near source | PM <sub>9</sub> ; PM <sub>10</sub> | Elemental composition, Mineralogy | PIXE; XRD |
|     | Formenti et al. (2011)    | West Africa (AMMA-SOP-1)                                                                                | Ground-based, near source                        | PM <sub>9</sub>                    | Elemental composition             | XRF       |
|     | Formenti et al. (2008)    | Niger (AMMA-SOP0, DABEX); Senegal (DODO)                                                                | Aircraft, near source; Ground-based, near source | PM <sub>10</sub>                   | Elemental composition, Mineralogy | PIXE; XRD |
|     | Klaver et al. (2011)      | Mauritania, Mali, Niger (GERBLIS)                                                                       | Aircraft, near source                            | PM <sub>10</sub>                   | Elemental composition, Mineralogy | PIXE; XRD |
|     | (Ryder et al., 2015)      | West Africa (FENNEC)                                                                                    | Aircraft, near source                            | PM <sub>10</sub>                   | Elemental composition             | SEM       |

**Table S3. Location and references to the integrated dataset on SAf dust chemical tracers. Atmospheric observations are included for comparison.**

| Location ID                       | Description                                                                                                                      | References                                                             |
|-----------------------------------|----------------------------------------------------------------------------------------------------------------------------------|------------------------------------------------------------------------|
| Namib GP                          | Central Namib Gravel Plain, western Namibia.                                                                                     | This study; Di Biagio et al. (2017); Qu (2016)                         |
| Kalahari NAM                      | Western Kalahari, central Namibia                                                                                                | Qu (2016)                                                              |
| Kalahari BOT                      | Southwestern Kalahari, southwestern Botswana. Areas of the Kalahari north and south of the Okavango Delta, northwestern Botswana | This study                                                             |
| Salt Pans                         | Etosha Pan, northern Namibia. Makgadikgadi and Nxai Pans, northeastern Botswana                                                  | This study (Etosha Pan only); (Engelbrecht et al., 2016).              |
| Coastal rivers                    | Ephemeral riverbeds on the Namibian coast, including Huab, Omaruru, and Kuiseb rivers                                            | This Study                                                             |
| Skukuza                           | Savannah soils at Skukuza in the Kruger National Park, South Africa                                                              | This Study                                                             |
| Hope Mine                         | Abandoned copper mine, central western Namibia                                                                                   | This Study                                                             |
| Free State                        | Agricultural soils in the Free State                                                                                             | This Study                                                             |
| Henties Bay – Dust mixed aerosols | Atmospheric aerosols over the Namibian coast                                                                                     | Desboeufs et al. (2024); Formenti et al. (2025); Klopper et al. (2020) |
| SA Highveld – Dust mixed aerosols | Atmospheric aerosols over the South African Highveld, an inland urban-industrial environment                                     | Baldo et al. (2025)                                                    |

40 **Table S4. Summary statistics of elemental enrichment factors in mineral dust across Southern Africa, Australia, Southern America, and Northern Africa. Data source references are provided in Table S2.**

| Region | Element | N total | Mean | Median | sd    | 25 <sup>th</sup> percentile | 75 <sup>th</sup> percentile | Min  | Max    |
|--------|---------|---------|------|--------|-------|-----------------------------|-----------------------------|------|--------|
| SAf    | Si      | 72      | 1.39 | 0.74   | 2.64  | 0.67                        | 1.00                        | 0.45 | 18.36  |
|        | Mg      | 70      | 7.20 | 1.98   | 18.45 | 1.16                        | 4.71                        | 0.31 | 109.52 |
|        | K       | 70      | 1.80 | 1.17   | 1.99  | 1.06                        | 1.78                        | 0.00 | 12.49  |
|        | Ca      | 72      | 7.02 | 1.27   | 16.13 | 0.82                        | 4.61                        | 0.00 | 96.39  |
|        | Fe      | 72      | 1.69 | 1.62   | 0.92  | 1.20                        | 1.71                        | 0.93 | 7.03   |
|        | Mn      | 63      | 2.82 | 1.88   | 3.67  | 0.95                        | 3.13                        | 0.00 | 18.33  |
|        | P       | 63      | 2.55 | 1.70   | 1.87  | 1.11                        | 3.34                        | 0.64 | 7.34   |
|        | Na      | 63      | 0.62 | 0.35   | 2.06  | 0.17                        | 0.57                        | 0.00 | 16.55  |
|        | Ti      | 70      | 2.11 | 1.54   | 1.20  | 1.37                        | 2.89                        | 0.00 | 6.16   |
| Aus    | Si      | 49      | 1.25 | 0.82   | 1.85  | 0.67                        | 0.97                        | 0.37 | 12.54  |
|        | Mg      | 12      | 0.62 | 0.53   | 0.40  | 0.36                        | 0.64                        | 0.28 | 1.74   |
|        | K       | 16      | 0.75 | 0.82   | 0.41  | 0.38                        | 0.92                        | 0.23 | 1.75   |
|        | Ca      | 21      | 0.56 | 0.46   | 0.52  | 0.30                        | 0.63                        | 0.09 | 2.38   |
|        | Fe      | 57      | 1.87 | 1.75   | 0.75  | 1.35                        | 2.24                        | 0.52 | 4.74   |
|        | Mn      | 49      | 2.73 | 1.66   | 2.98  | 1.16                        | 3.16                        | 0.12 | 18.22  |
|        | P       | 9       | 0.89 | 0.83   | 0.21  | 0.77                        | 0.98                        | 0.60 | 1.28   |
|        | Na      | 13      | 0.37 | 0.12   | 0.63  | 0.05                        | 0.19                        | 0.03 | 2.25   |
|        | Ti      | 52      | 1.59 | 1.19   | 1.02  | 0.82                        | 2.33                        | 0.32 | 4.09   |
| NAf    | Si      | 508     | 0.65 | 0.64   | 0.12  | 0.60                        | 0.70                        | 0.15 | 1.49   |
|        | Mg      | 508     | 0.70 | 0.63   | 0.39  | 0.42                        | 0.88                        | 0.00 | 2.63   |
|        | K       | 508     | 0.60 | 0.60   | 0.27  | 0.46                        | 0.71                        | 0.00 | 1.88   |
|        | Ca      | 508     | 1.00 | 0.75   | 1.37  | 0.28                        | 1.30                        | 0.00 | 18.87  |
|        | Fe      | 508     | 1.25 | 1.24   | 0.33  | 1.15                        | 1.35                        | 0.00 | 4.72   |
|        | Mn      | 10      | 2.40 | 1.72   | 1.69  | 1.57                        | 2.53                        | 0.96 | 6.46   |
|        | P       | 501     | 1.20 | 1.23   | 0.61  | 1.00                        | 1.47                        | 0.00 | 6.64   |
|        | Na      | 501     | 0.16 | 0.02   | 0.49  | 0.00                        | 0.16                        | 0.00 | 8.89   |
|        | Ti      | 508     | 1.95 | 1.92   | 0.81  | 1.62                        | 2.24                        | 0.00 | 9.26   |
| SAm    | Si      | 160     | 1.05 | 1.00   | 0.25  | 0.91                        | 1.22                        | 0.29 | 2.11   |
|        | Mg      | 152     | 1.54 | 1.30   | 1.01  | 0.94                        | 2.14                        | 0.00 | 5.76   |
|        | K       | 152     | 1.37 | 1.37   | 0.44  | 1.11                        | 1.51                        | 0.51 | 3.23   |
|        | Ca      | 160     | 1.89 | 1.44   | 1.75  | 1.07                        | 1.91                        | 0.15 | 12.43  |
|        | Fe      | 161     | 1.26 | 1.19   | 0.72  | 1.05                        | 1.32                        | 0.43 | 9.65   |
|        | Mn      | 151     | 2.36 | 1.30   | 3.42  | 0.47                        | 2.96                        | 0.00 | 26.39  |
|        | P       | 137     | 6.74 | 5.82   | 4.86  | 4.86                        | 6.96                        | 1.40 | 53.89  |

|  |    |     |      |      |      |      |      |      |       |
|--|----|-----|------|------|------|------|------|------|-------|
|  | Na | 151 | 0.77 | 0.78 | 0.41 | 0.58 | 0.95 | 0.00 | 2.21  |
|  | Ti | 152 | 4.12 | 4.06 | 1.59 | 3.44 | 4.89 | 1.06 | 16.57 |

45 **Table S5. Summary statistics of key mineral components in mineral dust across Southern Africa, Australia, Southern America, and Northern Africa. Data source references are provided in Table S2.**

| Region | Mineral    | N total | Mean | Median | sd | 25 <sup>th</sup> percentile | 75 <sup>th</sup> percentile | Min | Max |
|--------|------------|---------|------|--------|----|-----------------------------|-----------------------------|-----|-----|
| SAf    | Quartz     | 18      | 13   | 10     | 10 | 7                           | 14                          | 0   | 37  |
|        | Clays      | 18      | 62   | 61     | 14 | 57                          | 70                          | 21  | 87  |
|        | Carbonates | 18      | 8    | 4      | 18 | 0                           | 4                           | 0   | 78  |
|        | Feldspars  | 18      | 15   | 16     | 13 | 2                           | 26                          | 0   | 34  |
| Aus    | Quartz     | 1       | 34   | 34     | -  | 34                          | 34                          | 34  | 34  |
|        | Clays      | 1       | 57   | 57     | -  | 57                          | 57                          | 57  | 57  |
|        | Carbonates | 1       | 0    | 0      | -  | 0                           | 0                           | 0   | 0   |
|        | Feldspars  | 1       | 6    | 6      | -  | 6                           | 6                           | 6   | 6   |
| NAf    | Quartz     | 61      | 12   | 10     | 8  | 7                           | 13                          | 1   | 41  |
|        | Clays      | 61      | 84   | 87     | 11 | 84                          | 91                          | 49  | 96  |
|        | Carbonates | 61      | 2    | 1      | 5  | 0                           | 2                           | 0   | 26  |
|        | Feldspars  | 61      | 1    | 1      | 2  | 0                           | 1                           | 0   | 14  |
| SAm    | Quartz     | 2       | 26   | 26     | 22 | 18                          | 34                          | 11  | 42  |
|        | Clays      | 2       | 60   | 60     | 13 | 56                          | 65                          | 51  | 69  |
|        | Carbonates | 2       | 6    | 6      | 9  | 3                           | 9                           | 0   | 12  |
|        | Feldspars  | 2       | 6    | 6      | 0  | 6                           | 6                           | 6   | 6   |

### **Text S1. Data processing of aerosol size distribution measurements.**

The experiments conducted with GAMEL and CESAM employ different generation methods and instrumentation setups, necessitating distinct data-processing approaches.

- 50 For GAMEL experiments, the size-distribution data were converted into volume distributions ( $\pi/6 \cdot D^3 \cdot dN/d\log D$ ), where  $D$  is the particle diameter measured by the instrument. To allow comparison between samples while accounting for differences in dust-generation efficiency among soils, data were retained only for the first 3 minutes of dust generation, normalised so that the integral equals 1 over a common diameter range (the full diameter range measured by the GRIMM), and averaged. Repeated experiments on the same soil samples under the same shaking conditions were averaged.
- 55 For the CESAM experiments, the protocol for data reduction to obtain the aerosol dust size distribution is established as part of the CESAM procedures and is described in detail elsewhere (Di Biagio et al., 2019; Di Biagio et al., 2017). The first step of the procedure converts the working diameters of the SMPS, GRIMM, and WELAS instruments (which are, respectively, electrical mobility and optical diameters) into a sphere-equivalent geometric diameter ( $D_g$ ). Di Biagio et al. (2019) have shown that the correction factor for the optical particle counters (OPCs, WELAS and GRIMM) is less sensitive to the complex
- 60 refractive index in the range of values expected for mineral dust in the visible and near-infrared. In this study, we assume an average refractive index of  $1.53 + 0.004i$  for both the WELAS and the GRIMM, yielding estimated  $D_g$  values of 0.65-73.0  $\mu\text{m}$  for the WELAS and 0.29-68.2  $\mu\text{m}$  for the GRIMM. The average dry aerodynamic shape factor required to convert the electrical mobility diameter measured by the SMPS to geometric diameter is 1.2, which best matches the SMPS number size distribution with those of the GRIMM or WELAS in their overlap range. The aerosol dust number size distribution between
- 65 10 nm and 73  $\mu\text{m}$  can then be obtained by combining the number size distributions measured by the different probes. For these experiments, the GRIMM is preferred over the WELAS for particles smaller than approximately 800 nm due to its higher counting efficiency. Due to size-dependent particle losses in the sampling lines, the measured number size distributions are reduced in size range from 0.01 to 23.7  $\mu\text{m}$ , which is consistent with previous work (Baldo et al., 2023; Caponi et al., 2017; Di Biagio et al., 2019). For comparison with GAMEL, only measurements collected shortly after the dust injection peak in
- 70 CESAM were retained, as larger particles are rapidly lost by gravitational settling. The data were converted to volume distributions, normalised so that the integral equals 1 over a common diameter range, averaged, and interpolated using the “smooth.spline” function from the core CRAN R software to obtain values over a consistent diameter range, matching the GAMEL experimental data.

75 **Text S2. Data source for the rainfall map of Southern Africa**

The rainfall map of Southern Africa is derived from the Climate Hazard Group InfraRed Precipitation with Stations dataset version 3 ( CHIRPS3, 2025). This dataset integrates satellite-based thermal infrared rainfall estimates with ground-based observations, at a spatial resolution of  $0.05^\circ$  by  $0.05^\circ$ , covering the global domain and including additional sub-domain datasets. It contains long-term rainfall records from 1981 to the near present, with temporal resolutions ranging from daily to  
80 annual. For our analysis, we used ten years of annual rainfall data for the Africa sub-domain product from 2015 to 2024.

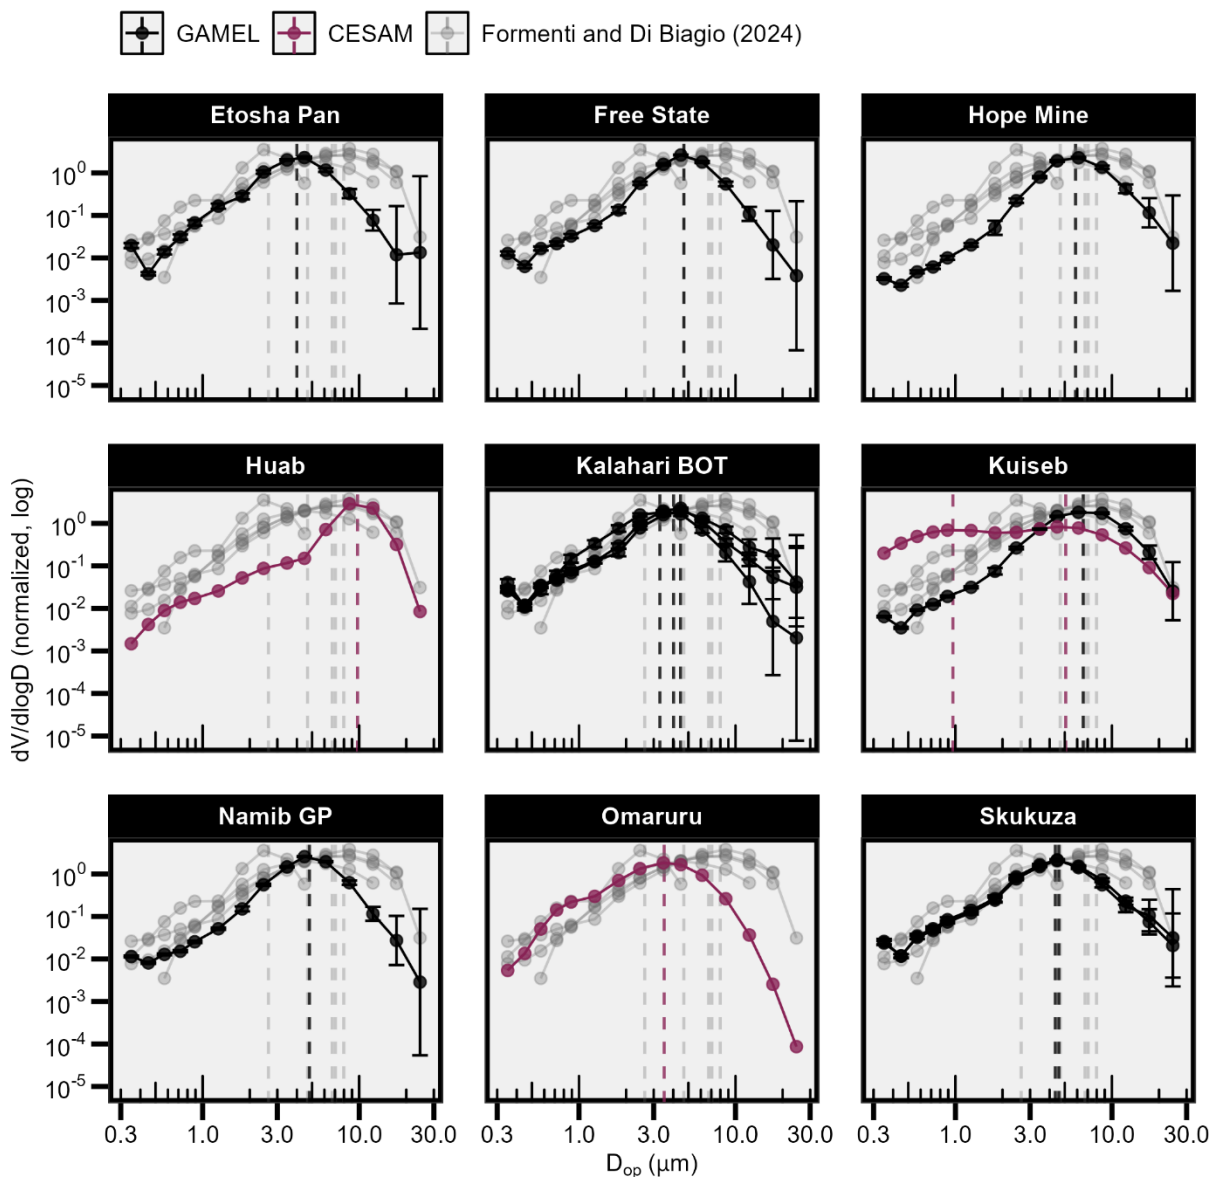

85 **Figure S1.** Size distribution data obtained during the laboratory generation of dust aerosols using GAMEL aerosol generator and the CESAM multiphase simulation chambers. Observations of  $\text{PM}_{10}$  and  $\text{PM}_{20}$  aerosols collected near source regions from the integrated dataset compiled by Formenti and Di Biagio (2024) (including Fratini et al., 2007; Gillette et al., 1974; Rajot et al., 2008; Shao et al., 2011; Sow et al., 2009) are shown for comparison. Data are reported as volume distributions ( $\mu\text{m}^3 \text{cm}^{-3}$ ) normalised so that the integral equals 1 over a common diameter range. The dashed lines indicate the peaks of the single-mode log-normal fitted distributions. Only the aerosol sample generated in CESAM from Kuiseb River sediments exhibits an additional peak at  $1 \mu\text{m}$ .

90

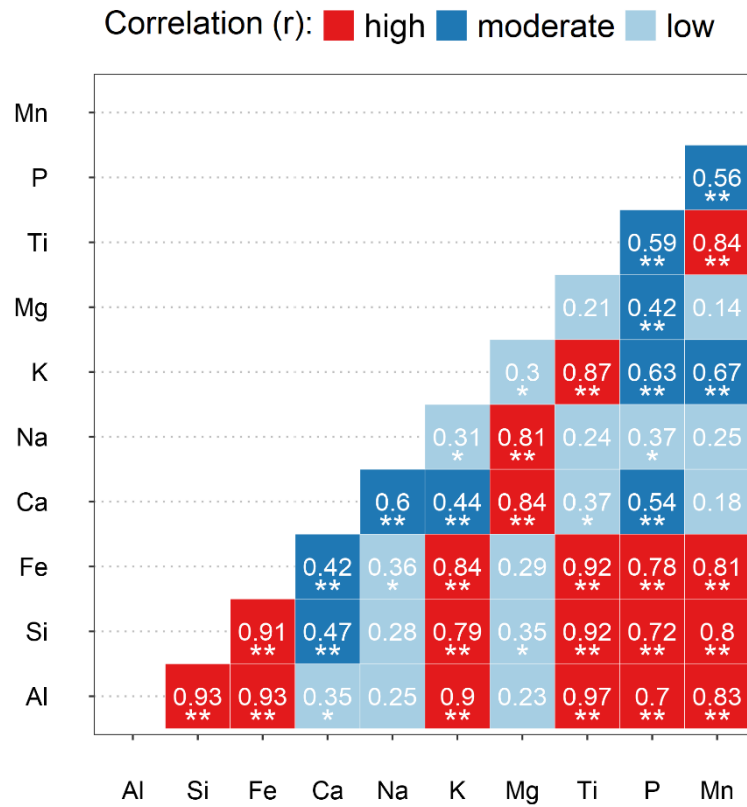

**Figure S2. Correlations between crustal elements. The correlation matrix reports estimated r values from linear regression. Note that \* indicates p-values  $\leq 0.05$ , while \*\* indicates p-values  $\leq 0.01$ .**

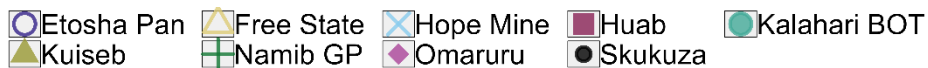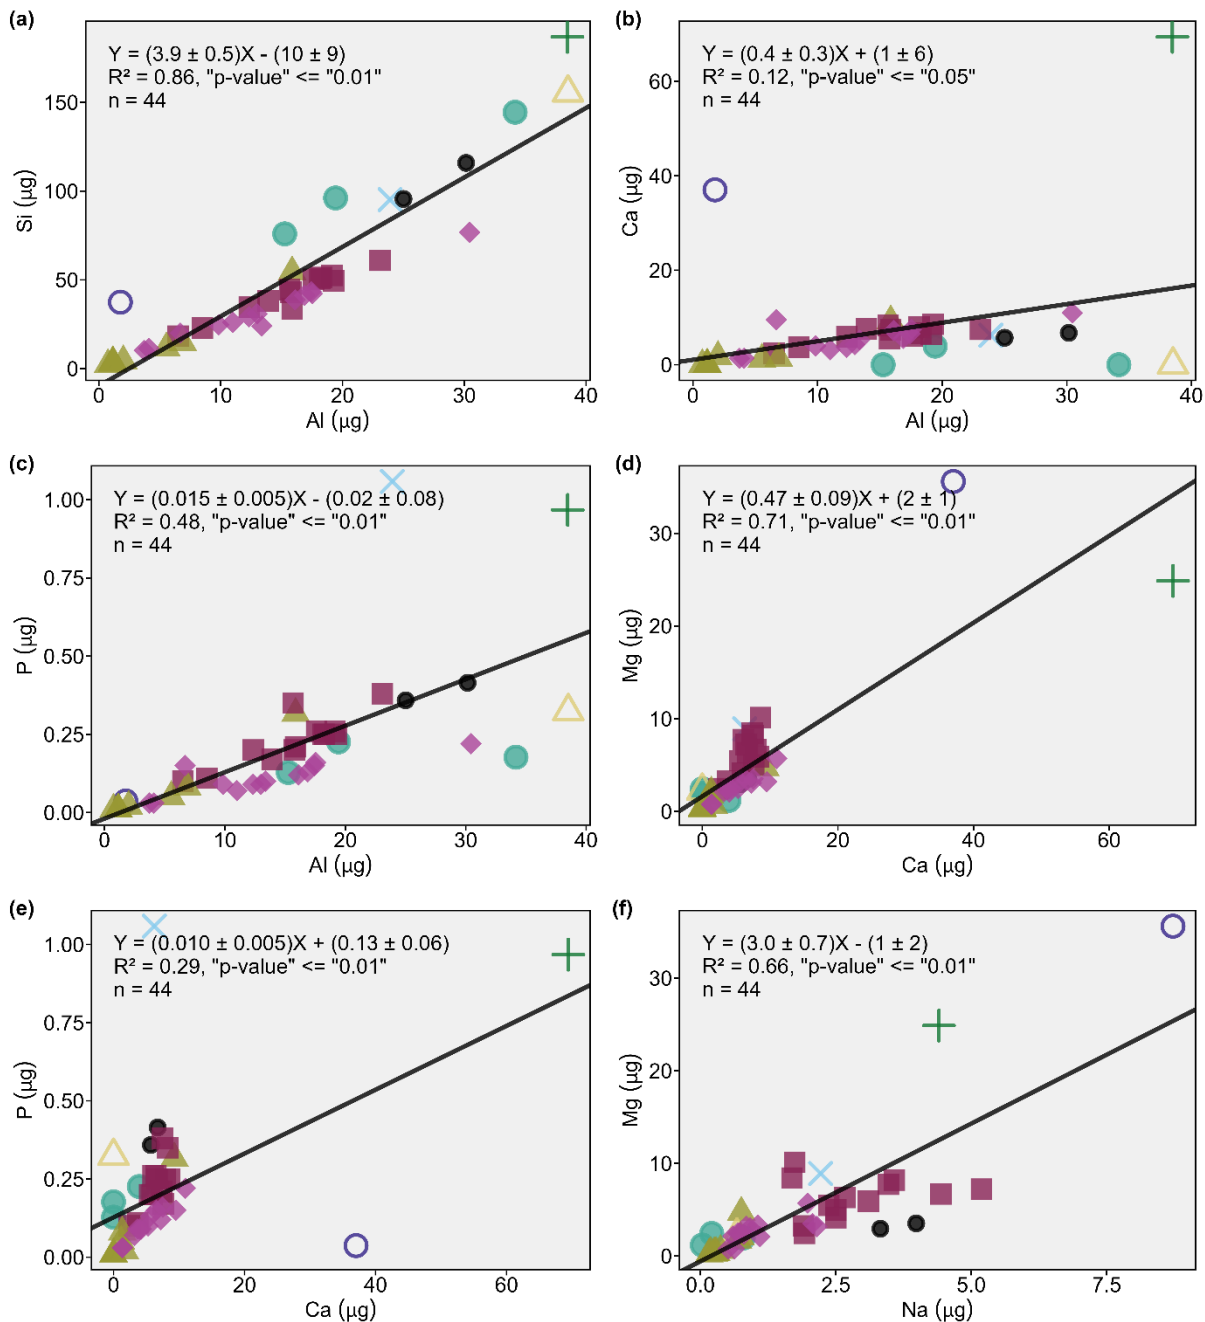

95 **Figure S3. Key element correlations supporting the correlation matrix in Figure S2. The analysis includes all data points. Uncertainty in XRF measurements is 10%.**

△ Free State 
 ■ Huab 
 ● Kalahari BOT 
 ▲ Kuiseb 
 ◆ Omaruru 
 ● Skukuza

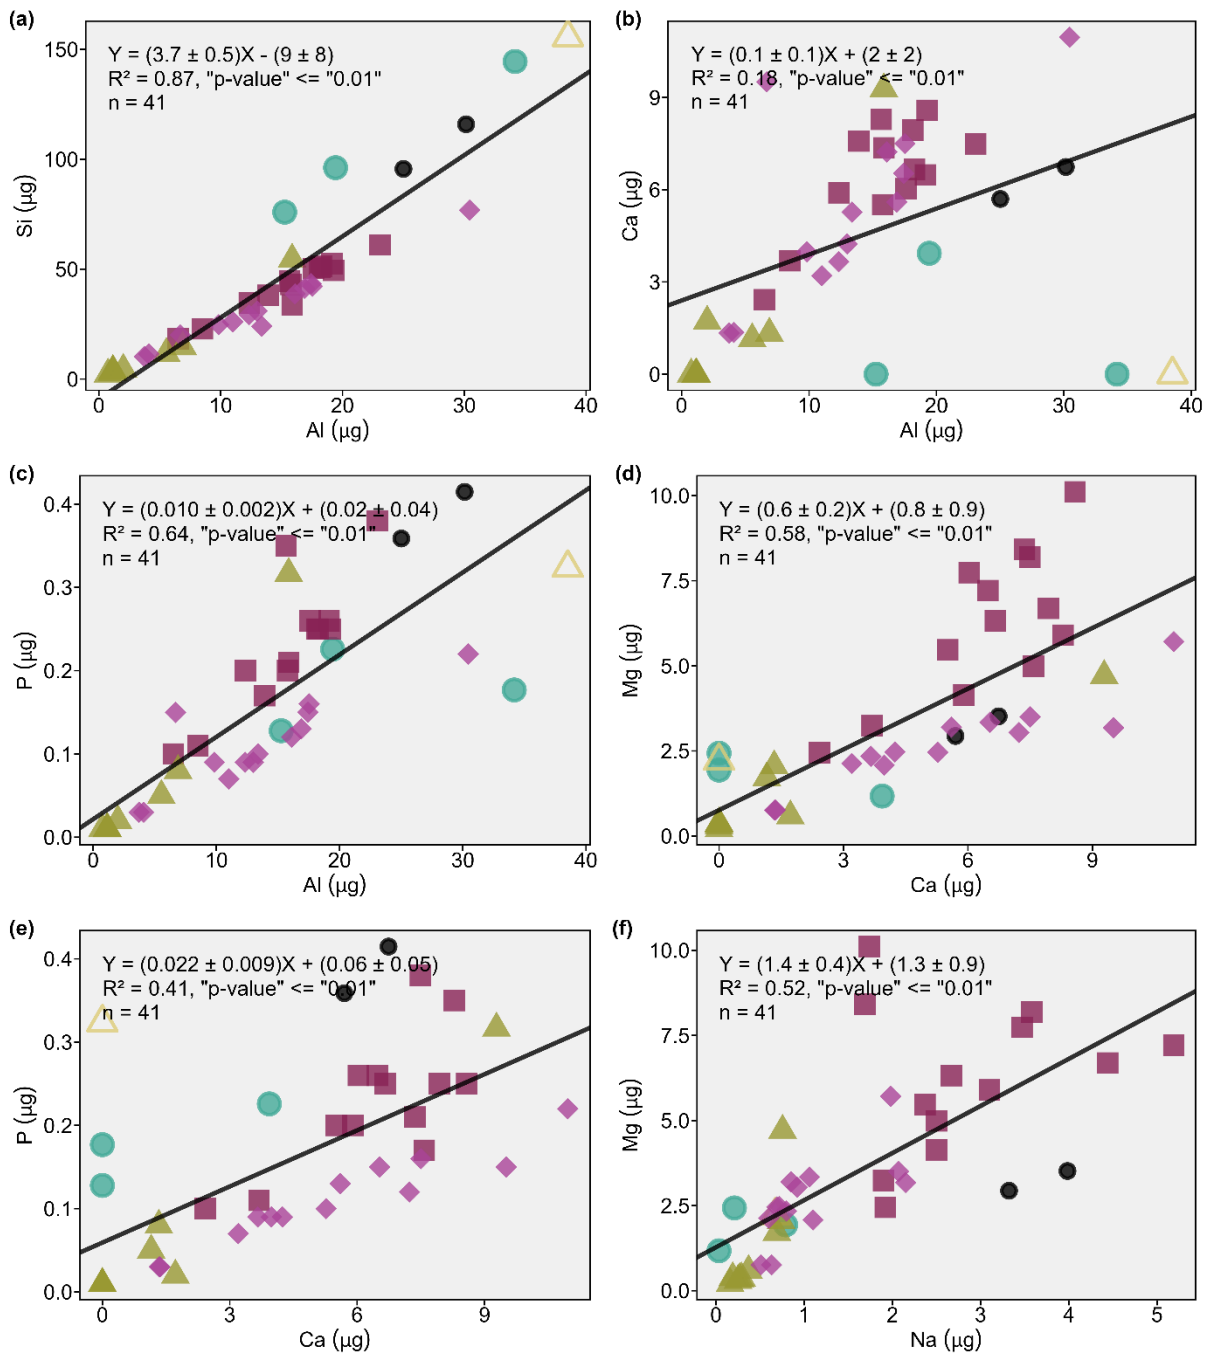

**Figure S4. Key element correlations supporting the correlation matrix in Figure S2. Namib GB, Etosha Pan, and Hope Mine are not included. Key correlations are maintained even after removing extreme values. Uncertainty in XRF measurements is 10%.**

100

△ Free State 
 × Hope Mine 
 ■ Huab 
 ● Kalahari BOT 
 ▲ Kuiseb 
 + Namib GP 
 ● Skukuza

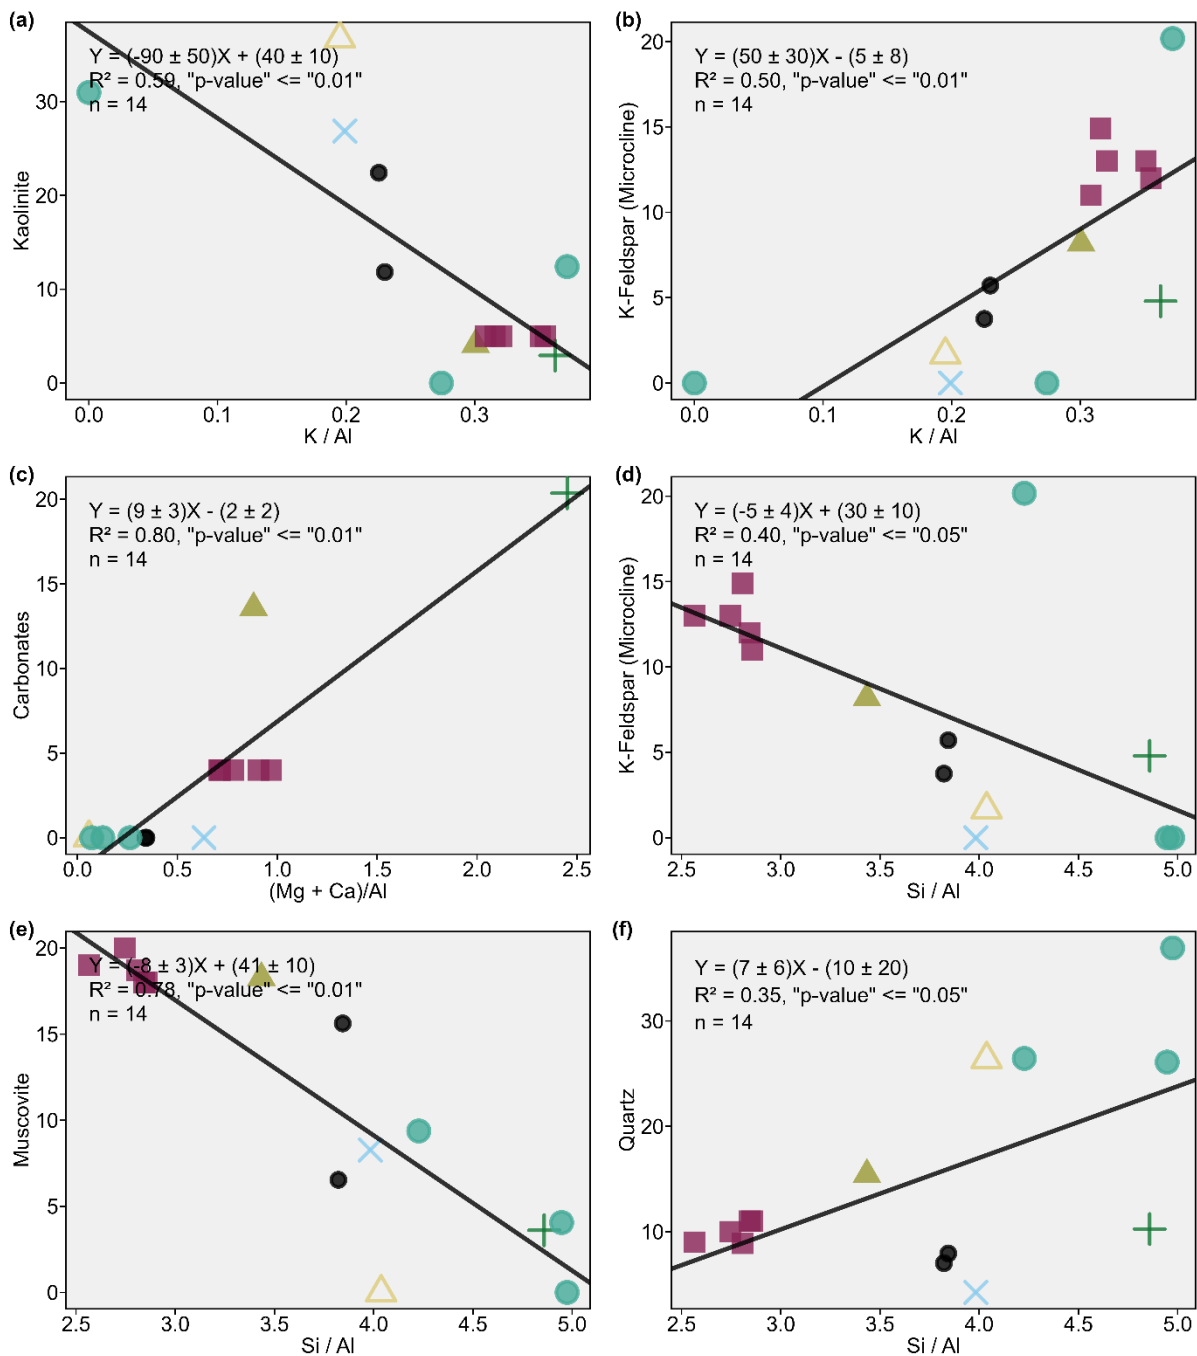

**Figure S5. Correlations between key crustal element ratios and minerals. Note that Etosha Pan was excluded from the analysis because its composition significantly differs from the other dust samples. Uncertainty in XRF and XRD measurements is 10%.**

## 105 References

- Baldo, C., Formenti, P., Di Biagio, C., Lu, G., Song, C., Cazaunau, M., Panguì, E., Doussin, J. F., Dagsson-Waldhauserova, P., Arnalds, O., Beddows, D., MacKenzie, A. R., and Shi, Z.: Complex refractive index and single scattering albedo of Icelandic dust in the shortwave part of the spectrum, *Atmospheric Chemistry and Physics*, 23, 7975-8000, doi: 10.5194/acp-23-7975-2023, 2023.
- 110 Baldo, C., Language, B., Isolabella, T., Vernocchi, V., Massabò, D., van Zyl, P. G., Annegarn, H. J., Piketh, S., and Formenti, P.: Low-Level Urban Anthropogenic Sources Contribute to Strong Aerosol Light Absorption on the South African Highveld, *Journal of Geophysical Research-Atmospheres*, 130, e2024JD042846, doi: 10.1029/2024jd042846, 2025.
- Box, M. A., Radhi, M., and Box, G. P.: The great Sydney dust event: size-resolved chemical composition and comparison, in: IOP Conference Series-Earth and Environmental Science, 17th National Conference of the Australian Meteorological and Oceanographic Society, Canberra, AUSTRALIA, Jan 27-29 2010, doi: 10.1088/1755-1315/11/1/012015, 2010.
- 115 Caponi, L., Formenti, P., Massabo, D., Di Biagio, C., Cazaunau, M., Panguì, E., Chevaillier, S., Landrot, G., Andreae, M. O., Kandler, K., Piketh, S., Saeed, T., Seibert, D., Williams, E., Balkanski, Y., Prati, P., and Doussin, J. F.: Spectral- and size-resolved mass absorption efficiency of mineral dust aerosols in the shortwave spectrum: a simulation chamber study, *Atmospheric Chemistry and Physics*, 17, 7175-7191, doi: 10.5194/acp-17-7175-2017, 2017.
- 120 CHIRPS3: Climate Hazards Center Infrared Precipitation with Stations version 3. CHIRPS3 Data Repository <https://doi.org/10.15780/G2JQOP> (2025). Data was accessed on [August 2025], in, 2025.
- Demasy, C., Boye, M., Lai, B., Burckel, P., Feng, Y., Losno, R., Borensztajn, S., and Besson, P.: Iron dissolution from Patagonian dust in the Southern Ocean: under present and future conditions, *Frontiers in Marine Science*, 11, 1363088, doi: 10.3389/fmars.2024.1363088, 2024.
- 125 Desboeufs, K., Formenti, P., Torres-Sánchez, R., Schepanski, K., Chaboureau, J. P., Andersen, H., Cermak, J., Feuerstein, S., Laurent, B., Klopper, D., Namwoonde, A., Cazaunau, M., Chevaillier, S., Feron, A., Mirande-Bret, C., Triquet, S., and Piketh, S.: Fractional solubility of iron in mineral dust aerosols over coastal Namibia: a link to marine biogenic emissions?, *Atmospheric Chemistry and Physics*, 24, 1525-1541, doi: 10.5194/acp-24-1525-2024, 2024.
- Di Biagio, C., Formenti, P., Balkanski, Y., Caponi, L., Cazaunau, M., Panguì, E., Journet, E., Nowak, S., Caquineau, S., Andreae, M. O., Kandler, K., Saeed, T., Piketh, S., Seibert, D., Williams, E., and Doussin, J. F.: Global scale variability of the mineral dust long-wave refractive index: a new dataset of in situ measurements for climate modeling and remote sensing, *Atmospheric Chemistry and Physics*, 17, 1901-1929, doi: 10.5194/acp-17-1901-2017, 2017.
- 130 Di Biagio, C., Formenti, P., Balkanski, Y., Caponi, L., Cazaunau, M., Panguì, E., Journet, E., Nowak, S., Andreae, M. O., Kandler, K., Saeed, T., Piketh, S., Seibert, D., Williams, E., and Doussin, J. F.: Complex refractive indices and single-scattering albedo of global dust aerosols in the shortwave spectrum and relationship to size and iron content, *Atmospheric Chemistry and Physics*, 19, 15503-15531, doi: 10.5194/acp-19-15503-2019, 2019.
- 135 Eltayeb, M. A. H., Vangrieken, R. E., Maenhaut, W., and Annegarn, H. J.: AEROSOL SOIL FRACTIONATION FOR NAMIB DESERT SAMPLES, *Atmospheric Environment Part a-General Topics*, 27, 669-678, doi: 10.1016/0960-1686(93)90185-2, 1993.
- 140 Engelbrecht, J. P., Moosmuller, H., Pincock, S., Jayanty, R. K. M., Lersch, T., and Casuccio, G.: Technical note: Mineralogical, chemical, morphological, and optical interrelationships of mineral dust re-suspensions, *Atmospheric Chemistry and Physics*, 16, 10809-10830, doi: 10.5194/acp-16-10809-2016, 2016.

- Formenti, P., Rajot, J. L., Desboeufs, K., Caquineau, S., Chevaillier, S., Nava, S., Gaudichet, A., Journet, E., Triquet, S., Alfaro, S., Chiari, M., Haywood, J., Coe, H., and Highwood, E.: Regional variability of the composition of mineral dust from western Africa: Results from the AMMA SOP0/DABEX and DODO field campaigns, *Journal of Geophysical Research-Atmospheres*, 113, doi: 10.1029/2008jd009903, 2008.
- 145 Formenti, P., Rajot, J. L., Desboeufs, K., Saïd, F., Grand, N., Chevaillier, S., and Schmechtig, C.: Airborne observations of mineral dust over western Africa in the summer Monsoon season: spatial and vertical variability of physico-chemical and optical properties, *Atmos. Chem. Phys.*, 11, 6387-6410, doi: 10.5194/acp-11-6387-2011, 2011.
- 150 Formenti, P., Caquineau, S., Desboeufs, K., Klaver, A., Chevaillier, S., Journet, E., and Rajot, J. L.: Mapping the physico-chemical properties of mineral dust in western Africa: mineralogical composition, *Atmospheric Chemistry and Physics*, 14, 10663-10686, doi: 10.5194/acp-14-10663-2014, 2014.
- Formenti, P., and Di Biagio, C.: Large synthesis of in situ field measurements of the size distribution of mineral dust aerosols across their life cycles, *Earth System Science Data*, 16, 4995-5007, doi: 10.5194/essd-16-4995-2024, 2024.
- 155 Formenti, P., Giorio, C., Desboeufs, K., Zhrebker, A., Gaetani, M., Baldo, C., Landrot, G., Montebello, S., Chevaillier, S., Triquet, S., Siour, G., Di Biagio, C., Battaglia, F., Doussin, J. F., Feron, A., Namwoonde, A., and Piketh, S. J.: Elemental composition, iron mineralogy and solubility of anthropogenic and natural mineral dust aerosols in Namibia: a case study analysis from the AEROCLO-sA campaign, *EGUsphere*, 2025, 1-28, doi: 10.5194/egusphere-2025-446, 2025.
- 160 Fratini, G., Ciccioli, P., Febo, A., Forgiione, A., and Valentini, R.: Size-segregated fluxes of mineral dust from a desert area of northern China by eddy covariance, *Atmos. Chem. Phys.*, 7, 2839-2854, doi: 10.5194/acp-7-2839-2007, 2007.
- Gaiero, D. M., Probst, J. L., Depetris, P. J., Bidart, S. M., and Leleyter, L.: Iron and other transition metals in Patagonian riverborne and windborne materials: geochemical control and transport to the southern South Atlantic Ocean, *Geochimica Et Cosmochimica Acta*, 67, 3603-3623, doi: 10.1016/S0016-7037(03)00211-4, 2003.
- 165 Gaiero, D. M., Brunet, F., Probst, J.-L., and Depetris, P. J.: A uniform isotopic and chemical signature of dust exported from Patagonia: Rock sources and occurrence in southern environments, *Chemical Geology*, 238, 107-120, doi: 10.1016/j.chemgeo.2006.11.003, 2007.
- Gillette, D. A., Blifford Jr., I. H., and Fryrear, D. W.: The influence of wind velocity on the size distributions of aerosols generated by the wind erosion of soils, *Journal of Geophysical Research (1896-1977)*, 79, 4068-4075, doi: 10.1029/JC079i027p04068, 1974.
- 170 Haywood, J. M., Pelon, J., Formenti, P., Bharmal, N., Brooks, M., Capes, G., Chazette, P., Chou, C., Christopher, S., Coe, H., Cuesta, J., Derimian, Y., Desboeufs, K., Greed, G., Harrison, M., Heese, B., Highwood, E. J., Johnson, B., Mallet, M., Marticorena, B., Marsham, J., Milton, S., Myhre, G., Osborne, S. R., Parker, D. J., Rajot, J.-L., Schulz, M., Slingo, A., Tanré, D., and Tulet, P.: Overview of the Dust and Biomass-burning Experiment and African Monsoon Multidisciplinary Analysis Special Observing Period-0, *Journal of Geophysical Research: Atmospheres*, 113, doi: 10.1029/2008JD010077, 2008.
- 175 Haywood, J. M., Johnson, B. T., Osborne, S. R., Baran, A. J., Brooks, M., Milton, S. F., Mulcahy, J., Walters, D., Allan, R. P., Klaver, A., Formenti, P., Brindley, H. E., Christopher, S., and Gupta, P.: Motivation, rationale and key results from the GERBILS Saharan dust measurement campaign, *Quarterly Journal of the Royal Meteorological Society*, 137, 1106-1116, doi: 10.1002/qj.797, 2011.
- 180 Humphries, M. S., McCarthy, T. S., Cooper, G. R. J., Stewart, R. A., and Stewart, R. D.: The role of airborne dust in the growth of tree islands in the Okavango Delta, Botswana, *Geomorphology*, 206, 307-317, doi: 10.1016/j.geomorph.2013.09.035, 2014.

- Karlson, L. R., Greene, R. S. B., Scott, K. M., Stelcer, E., and O'Loingsigh, T.: Characteristics of aeolian dust across northwest Australia, *Aeolian Research*, 12, 41-46, doi: 10.1016/j.aeolia.2013.11.003, 2014.
- 185 Klaver, A., Formenti, P., Caquineau, S., Chevaillier, S., Ausset, P., Calzolari, G., Osborne, S., Johnson, B., Harrison, M., and Dubovik, O.: Physico-chemical and optical properties of Sahelian and Saharan mineral dust: in situ measurements during the GERBILS campaign, *Quarterly Journal of the Royal Meteorological Society*, 137, 1193-1210, doi: 10.1002/qj.889, 2011.
- Klopper, D., Formenti, P., Namwoonde, A., Cazaunau, M., Chevaillier, S., Feron, A., Gaimoz, C., Hease, P., Lahmidi, F., Mirande-Bret, C., Triquet, S., Zeng, Z. R., and Piketh, S. J.: Chemical composition and source apportionment of atmospheric aerosols on the Namibian coast, *Atmospheric Chemistry and Physics*, 20, 15811-15833, doi: 10.5194/acp-20-15811-2020, 2020.
- 190 Lafon, S., Alfaro, S. C., Chevaillier, S., and Rajot, J. L.: A new generator for mineral dust aerosol production from soil samples in the laboratory: GAMEL, *Aeolian Research*, 15, 319-334, doi: 10.1016/j.aeolia.2014.04.004, 2014.
- McConnell, C. L., Highwood, E. J., Coe, H., Formenti, P., Anderson, B., Osborne, S., Nava, S., Desboeufs, K., Chen, G., and Harrison, M. A. J.: Seasonal variations of the physical and optical characteristics of Saharan dust: Results from the Dust Outflow and Deposition to the Ocean (DODO) experiment, *Journal of Geophysical Research: Atmospheres*, 113, D14S05, doi: 10.1029/2007JD009606, 2008.
- 195 Moreno, T., Amato, F., Querol, X., Alastuey, A., and Gibbons, W.: Trace element fractionation processes in resuspended mineral aerosols extracted from Australian continental surface materials, *Australian Journal of Soil Research*, 46, 128-140, doi: 10.1071/sr07121, 2008.
- Qu, Z.: Chemical properties of continental aerosol transported over the Southern Ocean: Patagonian and Namibian sources. , PhD Thesis in Geochemistry. Université Pierre et Marie Curie - Paris VI, 2016., doi: <https://theses.hal.science/tel-01349197v1>, 2016.
- 200 Radhi, M., Box, M. A., Box, G. P., Mitchell, R. M., Cohen, D. D., Stelcer, E., and Keywood, M. D.: Optical, physical and chemical characteristics of Australian continental aerosols: results from a field experiment, *Atmospheric Chemistry and Physics*, 10, 5925-5942, doi: 10.5194/acp-10-5925-2010, 2010a.
- 205 Radhi, M., Box, M. A., Box, G. P., Mitchell, R. M., Cohen, D. D., Stelcer, E., and Keywood, M. D.: Size-resolved mass and chemical properties of dust aerosols from Australia's Lake Eyre Basin, *Atmospheric Environment*, 44, 3519-3528, doi: 10.1016/j.atmosenv.2010.06.016, 2010b.
- Rajot, J. L., Formenti, P., Alfaro, S., Desboeufs, K., Chevaillier, S., Chatenet, B., Gaudichet, A., Journet, E., Marticorena, B., Triquet, S., Maman, A., Mouget, N., and Zakou, A.: AMMA dust experiment: An overview of measurements performed during the dry season special observation period (SOP0) at the Banizoumbou (Niger) supersite, *Journal of Geophysical Research: Atmospheres*, 113, D00C14, doi: 10.1029/2008JD009906, 2008.
- 210 Reeves, C. E., Formenti, P., Afif, C., Ancellet, G., Attié, J. L., Bechara, J., Borbon, A., Cairo, F., Coe, H., Crumeyrolle, S., Fierli, F., Flamant, C., Gomes, L., Hamburger, T., Jambert, C., Law, K. S., Mari, C., Jones, R. L., Matsuki, A., Mead, M. I., Methven, J., Mills, G. P., Minikin, A., Murphy, J. G., Nielsen, J. K., Oram, D. E., Parker, D. J., Richter, A., Schlager, H., Schwarzenboeck, A., and Thouret, V.: Chemical and aerosol characterisation of the troposphere over West Africa during the monsoon period as part of AMMA, *Atmos. Chem. Phys.*, 10, 7575-7601, doi: 10.5194/acp-10-7575-2010, 2010.
- 215 Rojas, C. M., Figueroa, L., Janssens, K. H., Vanespen, P. E., Adams, F. C., and Vangrieken, R. E.: THE ELEMENTAL COMPOSITION OF AIRBORNE PARTICULATE MATTER IN THE ATACAMA DESERT, CHILE, *Science of the Total Environment*, 91, 251-267, doi: 10.1016/0048-9697(90)90302-b, 1990.

- 220 Ryder, C. L., McQuaid, J. B., Flamant, C., Rosenberg, P. D., Washington, R., Brindley, H. E., Highwood, E. J., Marsham, J. H., Parker, D. J., Todd, M. C., Banks, J. R., Brooke, J. K., Engelstaedter, S., Estelles, V., Formenti, P., Garcia-Carreras, L., Kocha, C., Marengo, F., Sodemann, H., Allen, C. J. T., Bourdon, A., Bart, M., Cavazos-Guerra, C., Chevaillier, S., Crosier, J., Darbyshire, E., Dean, A. R., Dorsey, J. R., Kent, J., O'Sullivan, D., Schepanski, K., Szpek, K., Trembath, J., and Woolley, A.: Advances in understanding mineral dust and boundary layer processes over the Sahara from Fennec aircraft observations, *Atmos. Chem. Phys.*, 15, 8479-8520, doi: 10.5194/acp-15-8479-2015, 2015.

Shao, Y., Ishizuka, M., Mikami, M., and Leys, J. F.: Parameterization of size-resolved dust emission and validation with measurements, *Journal of Geophysical Research: Atmospheres*, 116, D08203, doi: 10.1029/2010JD014527, 2011.

Sow, M., Alfaro, S. C., Rajot, J. L., and Marticorena, B.: Size resolved dust emission fluxes measured in Niger during 3 dust storms of the AMMA experiment, *Atmos. Chem. Phys.*, 9, 3881-3891, doi: 10.5194/acp-9-3881-2009, 2009.

- 230 Wang, J., Doussin, J. F., Perrier, S., Perraudin, E., Katrib, Y., Pangui, E., and Picquet-Varrault, B.: Design of a new multi-phase experimental simulation chamber for atmospheric photosmog, aerosol and cloud chemistry research, *Atmospheric Measurement Techniques*, 4, 2465-2494, doi: 10.5194/amt-4-2465-2011, 2011.

Washington, R., Flamant, C., Parker, D., Marsham, J., McQuaid, J., Brindley, H., Todd, M., Highwood, E., Ryder, C., and Chaboureau, J.: Fennec—the Saharan climate system, *CLIVAR Exchanges*, 17, 31-33, 2012.

235
